# Supplementary material for: Mitochondrial Fission Is Required for Angiotensin II-Induced Cardiomyocyte Apoptosis Mediated by a Sirt1-p53 Signaling Pathway
Source: PubMed Central journal article supplement (PMC5854948; doi:10.3389/fphar.2018.00176), 2018-03-09
Supplement: Table1.pdf [file Table1.pdf]

1 **Supplemental Material**

2 **Supplemental Table S1.**

3 **Effect of Mdivi-1 on blood pressure in SHRs.**

|            | WKY              | SHR                | SHR+Mdivi-1       |
|------------|------------------|--------------------|-------------------|
| <b>SAP</b> | <b>122.5±9.2</b> | <b>195.2±7.9*</b>  | <b>196.7±5.9*</b> |
| <b>DAP</b> | <b>103.1±6.1</b> | <b>163.1±10.1*</b> | <b>159.3±6.4*</b> |

4 WKY: normotensive age-matched control rats, SHR: SHR age-matched control rats  
5 treated with vehicle, SHR+Mdivi-1: SHR treated with Mdivi-1. SAP, DAP: systolic and  
6 diastolic blood pressure at 22-week-old age. Data are presented as the mean ± standard  
7 error of the mean. \*p< 0.05 versus the WKY group. n=8.

8

9
